# Supplementary material for: Uncoordinated carbonyl groups of MOFs as anchoring sites for the preparation of highly active Pd nano-catalysts
Source: Royal Society of Chemistry journal article supplement (doi:10.1039/c2jm30867c), 2012-01-01
Supplement: c2jm30867c.pdf [file c2jm30867c.pdf]

## Supporting Information

### **Uncoordinated carbonyl groups of MOFs as anchoring sites for the preparation of highly active Pd nano-catalysts**

Yingyi Pan,<sup>a</sup> Deyun Ma,<sup>ab</sup> Huimin Liu,<sup>c</sup> Hao Wu,<sup>c</sup> Dehua He<sup>c</sup> and Yingwei Li\*<sup>a</sup>

<sup>a</sup> *School of Chemistry and Chemical Engineering, South China University of Technology, Guangzhou 510640, China.*

<sup>b</sup> *School of Chemistry and Chemical Engineering, Zhaoqing University, Zhaoqing 526061, China.*

<sup>c</sup> *Department of Chemistry, Tsinghua University, Beijing 100084, China.*

E-mail: liyw@scut.edu.cn

**Table S1.** Crystal data and structure refinement for Tm-MOF.

|                            |                                                                  |                                                    |                                                                   |
|----------------------------|------------------------------------------------------------------|----------------------------------------------------|-------------------------------------------------------------------|
| Empirical formula          | C <sub>9</sub> H <sub>13</sub> N <sub>3</sub> O <sub>11</sub> Tm |                                                    |                                                                   |
| Formula weight             | 508.15                                                           | <i>D<sub>c</sub></i> (mg/cm <sup>3</sup> )         | 1.905                                                             |
| Crystal system             | Triclinic                                                        | <i>F</i> (000)                                     | 490                                                               |
| Space group                | <i>P</i> -1                                                      | <i>μ</i> (mm <sup>-1</sup> )                       | 5.064                                                             |
| <i>a</i> / Å               | 6.0200(5)                                                        | Reflections collected                              | 4623                                                              |
| <i>b</i> / Å               | 12.7722(11)                                                      | Independent reflections                            | 3147 ( <i>R</i> <sub>int</sub> = 0.0279)                          |
| <i>c</i> / Å               | 13.1612(11)                                                      | Data/restraints/parameters                         | 3147/5/212                                                        |
| <i>α</i> /°                | 118.8290(10)                                                     | GOF                                                | 1.047                                                             |
| <i>β</i> /°                | 90.6090(10)                                                      | <i>θ</i> range for data collection (°)             | 1.77 to 25.20                                                     |
| <i>γ</i> /°                | 91.6870(10)                                                      | Final <i>R</i> indices [ <i>I</i> >2σ( <i>I</i> )] | <i>R</i> <sub>1</sub> = 0.0402<br><i>ωR</i> <sub>2</sub> = 0.0987 |
| <i>V</i> (Å <sup>3</sup> ) | 885.79(13)                                                       | <i>R</i> indices (all data)                        | <i>R</i> <sub>1</sub> = 0.0466<br><i>ωR</i> <sub>2</sub> = 0.1036 |
| <i>Z</i>                   | 2                                                                | Largest diff. peak and hole/eÅ <sup>-3</sup>       | 1.98 and 0.99                                                     |

$$R = \sum (|F_o| - |F_c|) / \sum |F_o|$$

$$wR = [\sum w(F_o^2 - F_c^2)^2 / \sum w(F_o^2)]^{1/2}$$

The Palladium contents of the samples were determined quantitatively by atomic absorption spectroscopy (AAS) on a HITACHI Z-2300 instrument. The calibration curve were obtained with a series of aqueous standard solutions of Pd(NO<sub>3</sub>)<sub>2</sub>. Approximately 0.0040 g of sample was weighed precisely and dissolved in 5 mL of aqua regia (HCl:HNO<sub>3</sub> = 3:1), and the solution was diluted with deionized water to reach a concentration of Pd approximately in the range from 0.5 to 1.5 mg L<sup>-1</sup>.

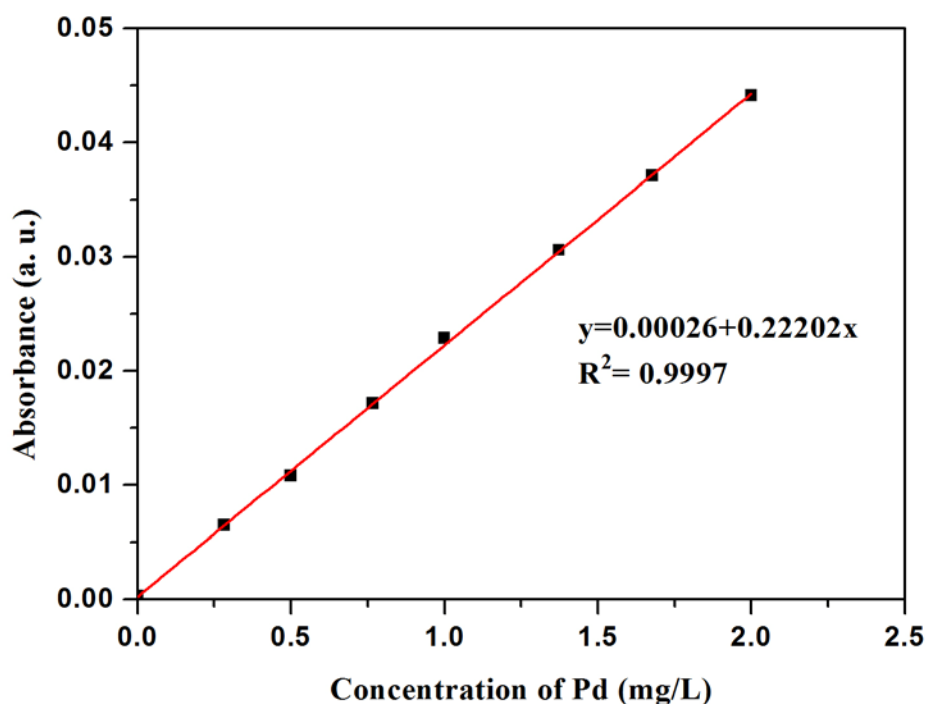

**Figure S1.** The AAS calibration curve for Pd using aqueous standard solution.

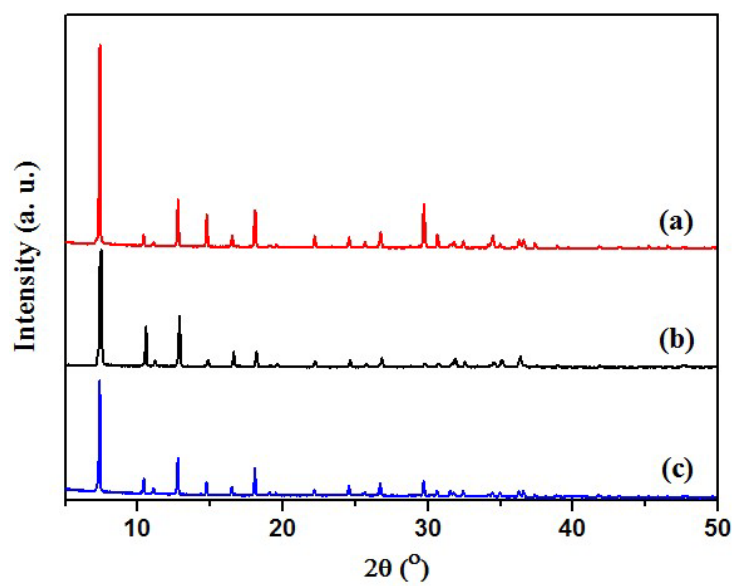

**Figure S2.** Powder X-ray diffraction patterns of ZIF-8: (a) stimulated, (b) as-synthesized, and (c) 1.0 wt% Pd/ZIF-8.
